# Supplementary material for: Visualization of the intracellular location and stability of DNA flowers with a label-free fluorescent probe
Source: Royal Society of Chemistry journal article supplement (doi:10.1039/c9ra01769k), 2019-01-01
Supplement: c9ra01769k1.pdf [file c9ra01769k1.pdf]

## Electronic Supplementary Information (ESI)

### Visualization of the Intracellular Location and Stability of DNA

#### Flower with a Label-free Fluorescent Probe

Yu Wei <sup>a</sup>, Xuehui Xu <sup>b</sup>, Yingxu Shang <sup>b</sup>, Qiao Jiang <sup>\*b</sup>, Can Li <sup>\*a</sup> and Baoquan Ding <sup>\*b</sup>

*a. Bio-X Institutes, Key Laboratory for the Genetics of Developmental and Neuropsychiatric Disorders (Ministry of Education), Shanghai Jiao Tong University, 200030 Shanghai, China.*

*b. CAS Key Laboratory of Nanosystem and Hierarchical Fabrication, CAS Center for Excellence in Nanoscience, National Center for NanoScience and Technology, 11 BeiYiTiao, ZhongGuanCun, 100190 Beijing, China.*

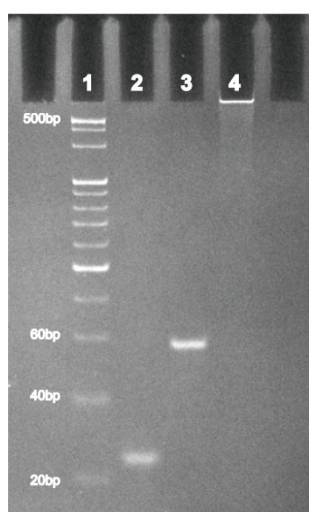

**Figure S1 Native Polyacrylamide gel (8%, 275V, 50min) electrophoresis image of the primer, template and DNA flowers (DFs).** Lane 1: 20bp DNA marker; lane 2: primer; lane 3: template; lane 4: DNA flowers.

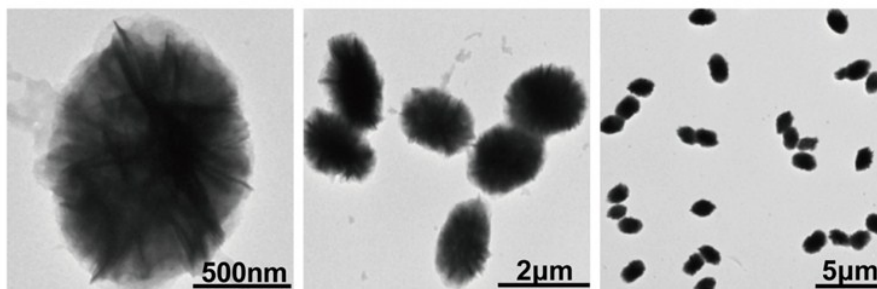

**Figure S2 TEM images of DNA flowers without free RIR dyes.** The results showed the sizes of the DFs were approximate of 1500 nm × 1000 nm.

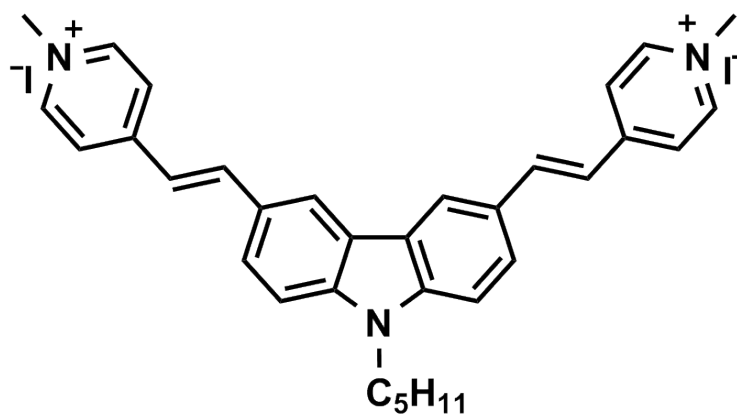

**Figure S3 Chemical structure of RIR dyes.**

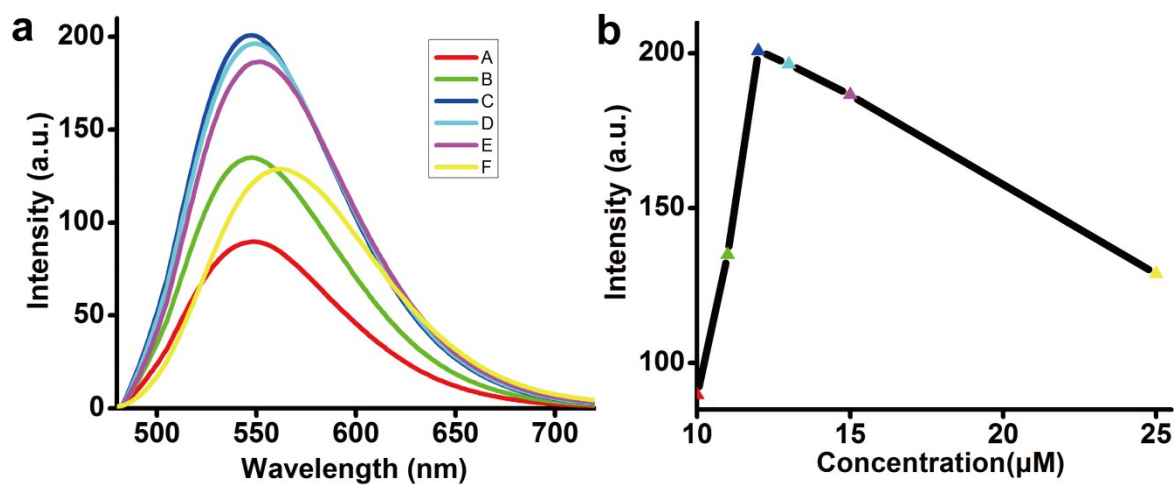

Figure S4 (a) Fluorescence spectrum of DFs stock solution incubated with (A) 10  $\mu\text{M}$ , (B) 11  $\mu\text{M}$ , (C) 12  $\mu\text{M}$ , (D) 13  $\mu\text{M}$ , (E) 15  $\mu\text{M}$ , (F) 25  $\mu\text{M}$  free RIR dyes. (b) Plot of the maximum fluorescence intensity *versus* the concentrations corresponding to (a). The analysis showed the fluorescence of RIR-DFs reached the maximum when 12  $\mu\text{M}$  free RIR dyes were added into DFs.

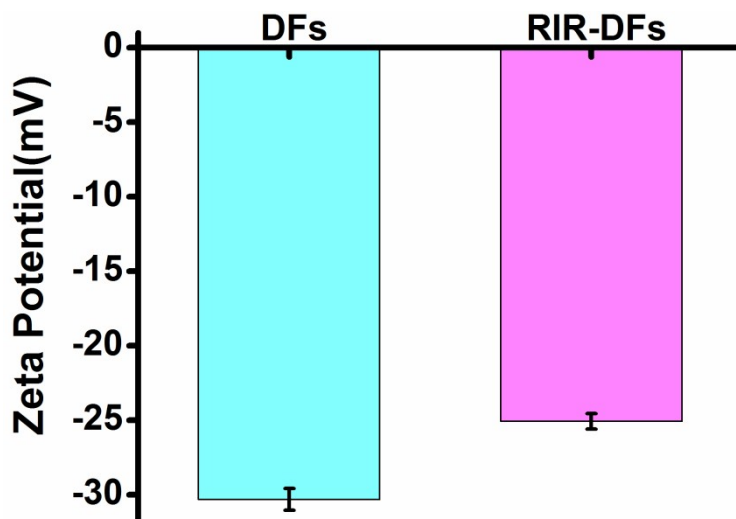

Figure S5 Zeta potential of DFs and RIR-DFs. The results showed the zeta potential was increased from -30mV for DFs to -25mV for RIR-DFs.

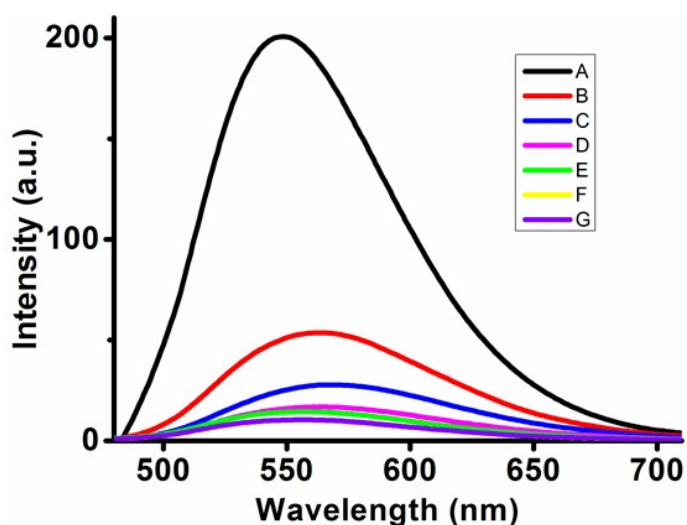

Figure S6 Fluorescence spectrum of RIR-DFs stock solution incubated with DNase I (15 unit/mL) for (A) 0 h, (B) 0.5 h, (C) 0.7 h, (D) 2 h, (E) 8 h,

(F) 20 h, (G) 40 h at 37° C.

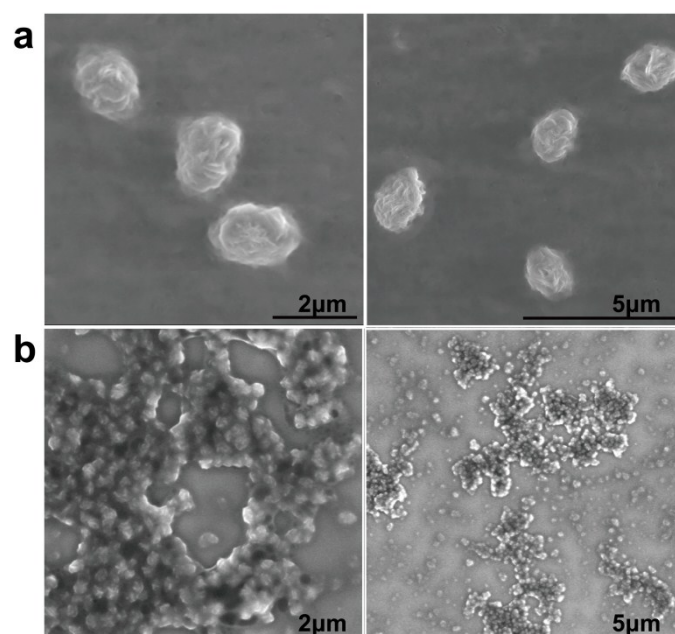

**Figure S7 SEM images of (a) RIR-DFs and (b) those after cleavage by DNase I.** The results showed that structures of RIR-DFs (256.8 ng/μL) were degraded after DNase I treatment (15U/mL, 40h at 37° C).

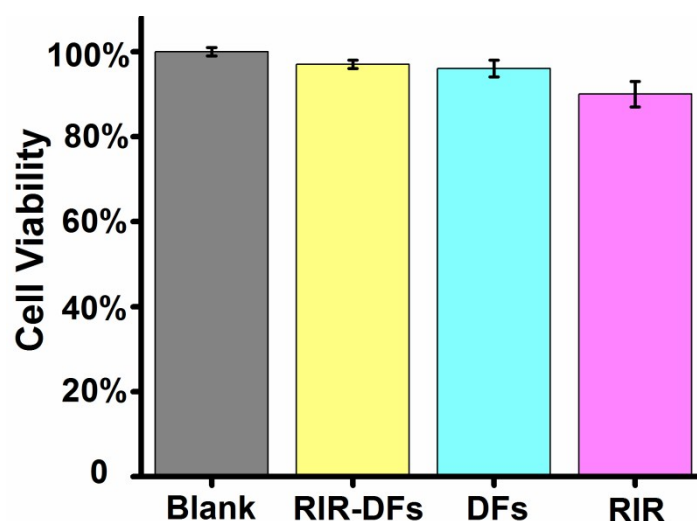

**Figure S8 Cell viability of RAW264.7 cells after administration with RIR dyes, DFs and RIR-DFs for 6 hours.** Error bars represent standard deviation of five independent experiments in quintuplicate wells of cells.

The results suggested that RIR dyes ( $0.36\mu\text{M}$ ), DFs ( $7.7\text{ng}/\mu\text{L}$ ) and RIR-DFs ( $7.7\text{ng}/\mu\text{L}$ ) all exhibited no detectable cytotoxicity after 6 h incubation.

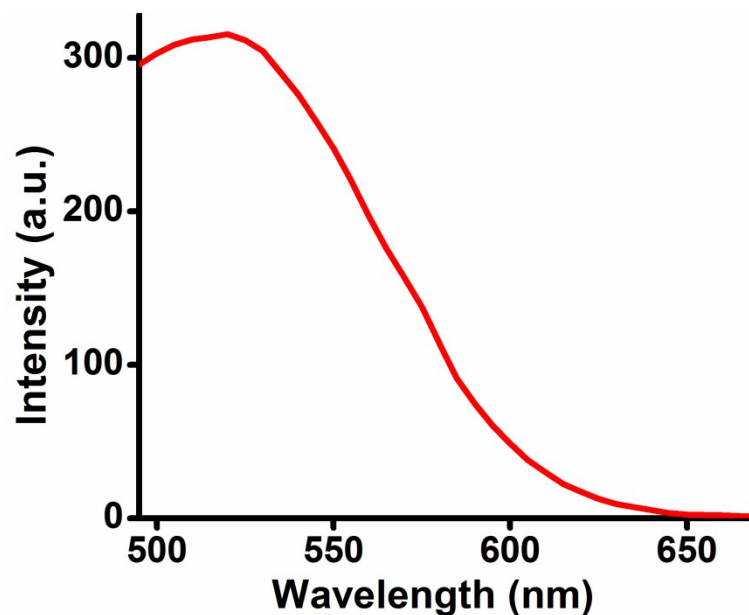

**Figure S9 Intracellular fluorescence intensity of RIR-DFs.** The results suggested that the intracellular fluorescence emitted with maximum emission wavelength at about 525nm.

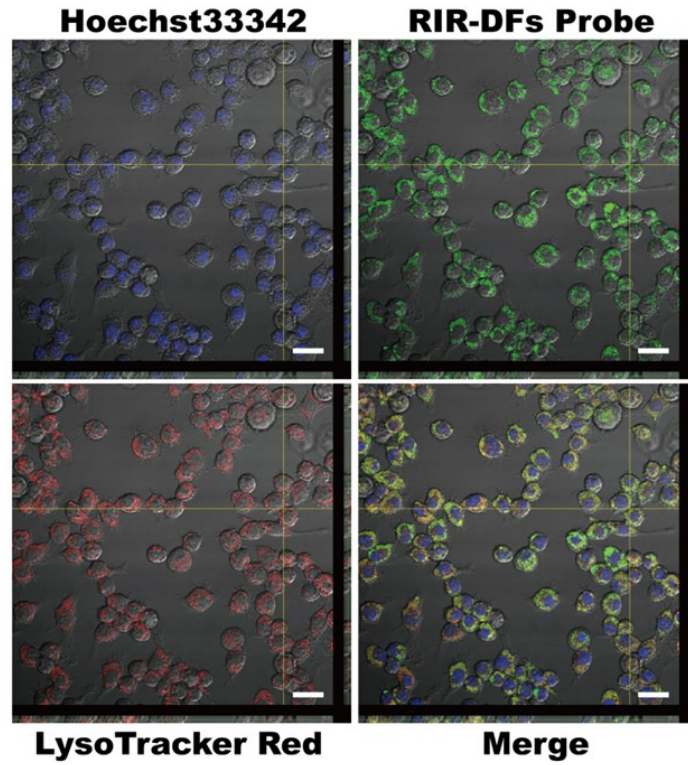

**Figure S10** Z-scanning images of RAW264.7 cells after administration with RIR-DFs. The images were taken every 0.36  $\mu\text{m}$  section from the top to the bottom of intact cells. Total depth: 5.04  $\mu\text{m}$ . Scale bar: 20  $\mu\text{M}$ .

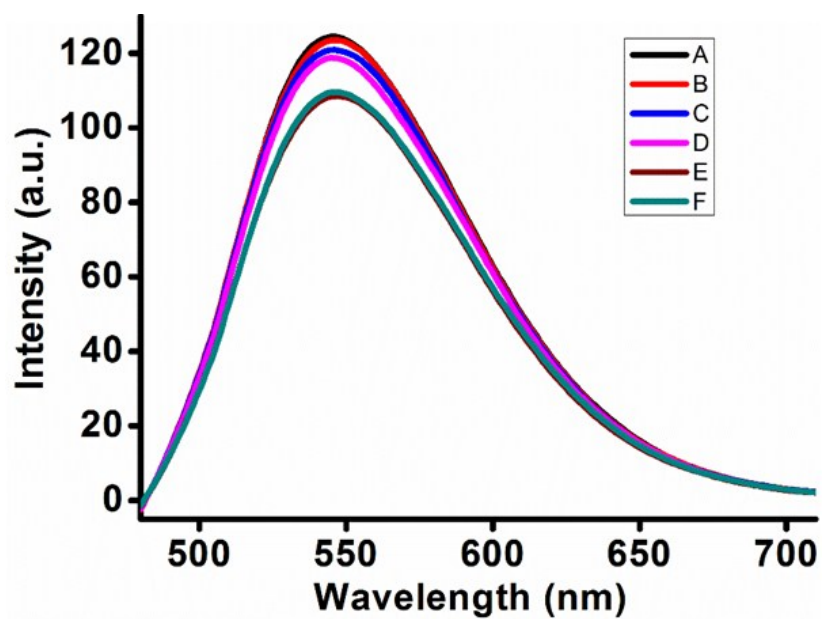

**Figure S11** Fluorescence spectrum of RIR-DFs (256.8 ng/ $\mu$ L) incubated with 10% FBS for (A) 0 h, (B) 6 h, (C) 18 h, (D) 24 h, (E) 48 h, (F) 72 h.

**Table S1. Sequences of oligonucleotides used in this work.**

|          |                                                                                                         |
|----------|---------------------------------------------------------------------------------------------------------|
| Template | TTCCCGGCGGCAGCAGTTAGATTTTTTTTTTTTTTTGGGTTAG<br>GGTTAGGGTTAGGGTTTTTTTTTTTTTTTTTTTTTTCTAACCGTA<br>CAGTATT |
| Primer   | TCTAACTGCTGCGCCGCCGGGAAAATACTGTACGGTTAG                                                                 |
| PolyT    | TTTTTTTTTTTTTTT                                                                                         |
